# Supplementary material for: Inhibition of TIR Domain Signaling by TcpC: MyD88-Dependent and Independent Effects on Escherichia coli Virulence
Source: PubMed Central journal article supplement (PMC2944809; doi:10.1371/journal.ppat.1001120), 2010-09-23

# Figure S1

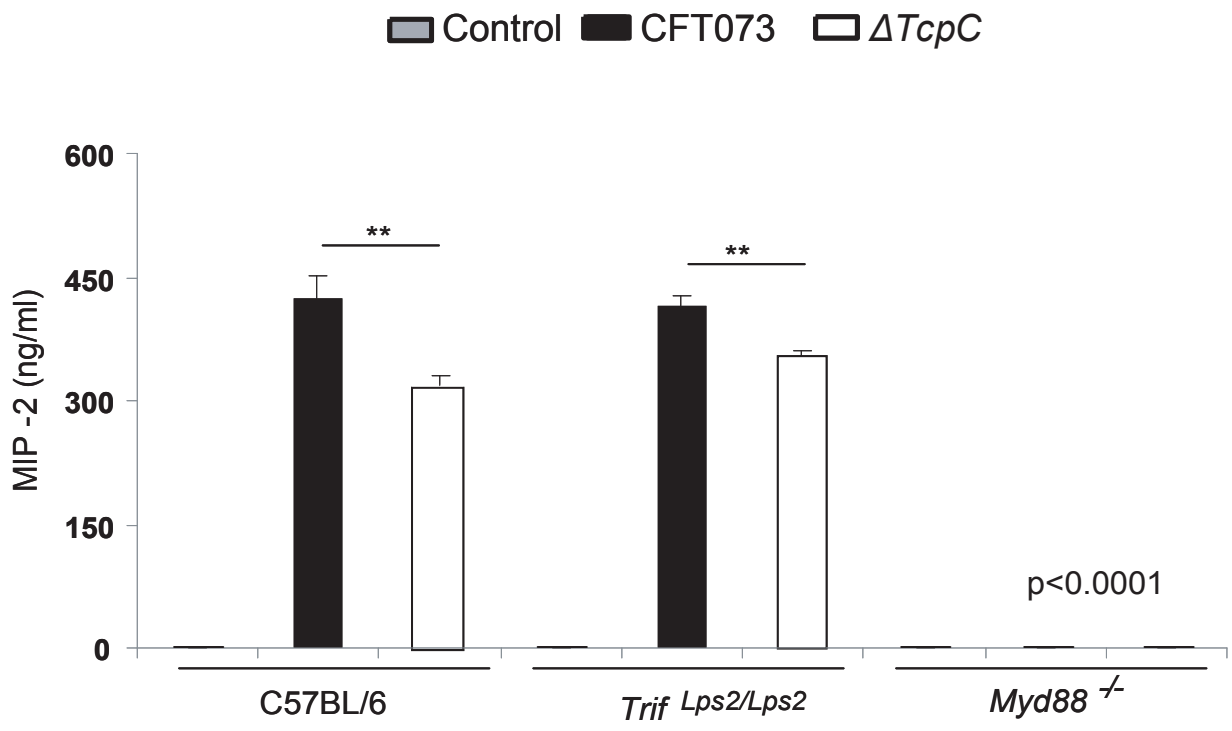

Supplement: ppat.1001120.s001.pdf [file ppat.1001120.s001.pdf]
