# Supplementary material for: Inhibition of TIR Domain Signaling by TcpC: MyD88-Dependent and Independent Effects on Escherichia coli Virulence
Source: PubMed Central journal article supplement (PMC2944809; doi:10.1371/journal.ppat.1001120), 2010-09-23
Supplement: ppat.1001120.s002.pdf [file ppat.1001120.s002.pdf]

**Table S1. Comparison of gene expression levels in pathways regulated by CFT073 and the  $\Delta$ TcpC mutant.**

| Functional Classification     | Entrez Gene ID | Gene Symbol | Gene Title                                                                               | Fold Change Over Control<br>CFT073 $\Delta$ TcpC * <i>p</i> values |        |       |
|-------------------------------|----------------|-------------|------------------------------------------------------------------------------------------|--------------------------------------------------------------------|--------|-------|
| <b>Pattern recognition</b>    |                |             |                                                                                          |                                                                    |        |       |
| a) MyD88 dependent            | 3569           | IL6         | Interleukin 6                                                                            | 16.982                                                             | 21.303 | 0.001 |
|                               | 7124           | TNF         | Tumor necrosis factor (TNF superfamily, member 2) (TNF), mRNA.                           | 8.128                                                              | 9.266  | 0.01  |
|                               | 3665           | IRF7        | Interferon regulatory factor 7                                                           | 2.675                                                              | 3.543  | 0.03  |
|                               | 4790           | NFKB1       | Nuclear factor of kappa light polypeptide gene enhancer in B-cells 1                     | 3.794                                                              | 4.269  | 0.05  |
|                               | 4791           | NFKB2       | Nuclear factor of kappa light polypeptide gene enhancer in B-cells 2                     | 4.401                                                              | 4.509  | ns    |
|                               | 3592           | IL12A       | interleukin 12A                                                                          | 4.958                                                              | 5.035  | ns    |
|                               | 10333          | TLR6        | Toll-like receptor 6                                                                     | 2.015                                                              | 1.909  | nt    |
|                               | 5970           | RELA        | v-rel reticuloendotheliosis viral oncogene homolog A                                     | 2.966                                                              | 2.633  | ns    |
| b) TRIF dependent             | 3659           | IRF1        | Interferon regulatory factor 1                                                           | 9.480                                                              | 9.659  | ns    |
|                               | 3660           | IRF2        | Interferon regulatory factor 2                                                           | 2.286                                                              | 2.148  | nt    |
|                               | 3665           | IRF7        | Interferon regulatory factor 7                                                           | 2.675                                                              | 3.543  | 0.03  |
|                               | 4790           | NFKB1       | Nuclear factor of kappa light polypeptide gene enhancer in B-cells 1                     | 3.794                                                              | 4.269  | 0.05  |
|                               | 4791           | NFKB2       | Nuclear factor of kappa light polypeptide gene enhancer in B-cells 2                     | 4.401                                                              | 4.509  | ns    |
|                               | 3456           | IFNB1       | Interferon, beta 1                                                                       | 24.915                                                             | 12.843 | 0.001 |
|                               | 7096           | TLR1        | Toll-like receptor 1                                                                     | 2.139                                                              | 2.136  | ns    |
|                               | 148022         | TICAM1      | Toll-like receptor adaptor molecule 1                                                    | 2.472                                                              | 2.261  | ns    |
|                               | 5970           | RELA        | v-rel reticuloendotheliosis viral oncogene homolog A                                     | 2.966                                                              | 2.633  | ns    |
|                               | 6352           | CCL5        | Chemokine (C-C motif) ligand 5                                                           | 4.392                                                              | 3.412  | 0.01  |
| c) Complement activation      | 5806           | PTX3        | Pentraxin-related gene, rapidly induced by IL-1 beta                                     | 36.656                                                             | 44.911 | 0.01  |
|                               | 718            | C3          | Complement component 3                                                                   | 2.419                                                              | 2.032  | ns    |
|                               | 5293           | PIK3CD      | Phosphoinositide-3-kinase, catalytic, delta polypeptide                                  | 2.251                                                              | 2.109  | ns    |
| <b>IL-1/IL-6 signaling **</b> |                |             |                                                                                          |                                                                    |        |       |
| a) Activators                 | 3569           | IL6         | Interleukin 6                                                                            | 16.982                                                             | 21.303 | 0.001 |
|                               | 3576           | IL8         | Interleukin 8                                                                            | 12.397                                                             | 12.826 | ns    |
|                               | 3552           | IL1A        | Interleukin 1, alpha                                                                     | 7.690                                                              | 10.468 | 0.03  |
|                               | 3553           | IL1B        | Interleukin 1, beta                                                                      | 10.651                                                             | 13.296 | 0.02  |
|                               | 7124           | TNF         | Tumor necrosis factor (TNF superfamily, member 2) (TNF), mRNA.                           | 8.128                                                              | 9.266  | 0.01  |
|                               | 7130           | TNFAIP6     | Tumor necrosis factor, alpha-induced protein 6                                           | 3.050                                                              | 3.627  | ns    |
|                               | 4982           | TNFRSF11B   | Tumor necrosis factor receptor superfamily, member 11b                                   | 1.456                                                              | 2.308  | 0.02  |
|                               | 4790           | NFKB1       | Nuclear factor of kappa light polypeptide gene enhancer in B-cells 1                     | 3.794                                                              | 4.269  | 0.05  |
|                               | 4791           | NFKB2       | Nuclear factor of kappa light polypeptide gene enhancer in B-cells 2                     | 4.401                                                              | 4.509  | ns    |
|                               | 3725           | JUN         | Jun oncogene (JUN)                                                                       | 2.103                                                              | 1.431  | 0.05  |
|                               | 2354           | FOSB        | FBJ murine osteosarcoma viral oncogene homolog B                                         | 3.184                                                              | 0.326  | 0.001 |
|                               | 6722           | SRF         | serum response factor(c-fos serum response element-binding transcription facto           | 2.162                                                              | 1.948  | nt    |
|                               | 1051           | CEBPB       | CCAAT/enhancer binding protein (C/EBP), beta                                             | 2.414                                                              | 2.507  | ns    |
|                               | 5606           | MAP2K3      | Mitogen-activated protein kinase kinase 3                                                | 3.436                                                              | 2.758  | ns    |
|                               | 5608           | MAP2K6      | Mitogen-activated protein kinase kinase 6                                                | 0.269                                                              | 0.288  | ns    |
|                               | 5970           | RELA        | v-rel reticuloendotheliosis viral oncogene homolog A                                     | 2.966                                                              | 2.633  | ns    |
| b) Inhibitors                 | 3557           | IL1RN       | Interleukin 1 receptor antagonist                                                        | 2.214                                                              | 1.898  | nt    |
|                               | 8651           | SOCS1       | Suppressor of cytokine signaling 1                                                       | 3.157                                                              | 3.752  | ns    |
|                               | 4792           | NFKBIA      | Nuclear factor of kappa light polypeptide gene enhancer in B-cells inhibitor, $\alpha$   | 7.484                                                              | 6.778  | 0.05  |
|                               | 4793           | NFKBIB      | Nuclear factor of kappa light polypeptide gene enhancer in B-cells inhibitor, $\beta$    | 2.262                                                              | 2.019  | nt    |
|                               | 4794           | NFKBIE      | Nuclear factor of kappa light polypeptide gene enhancer in B-cells inhibitor, $\epsilon$ | 7.245                                                              | 7.906  | ns    |
|                               | 64332          | NFKBIZ      | Nuclear factor of kappa light polypeptide gene enhancer in B-cells inhibitor, $\zeta$    | 3.690                                                              | 2.423  | 0.01  |
|                               | 9641           | IKBKE       | Inhibitor of kappa light polypeptide gene enhancer in B-cells, kinase epsilon            | 2.011                                                              | 2.298  | ns    |

\* - Significant difference between CFT073 versus  $\Delta$ TcpC infected cells. Remaining comparisons were not significant (ns) or not testable (nt)

\*\* - IL-1/IL-6 signalling pathways were significantly regulated ( $p < 0.026$ ).
